# Supplementary material for: All-Organic PTFE Coated PVDF Composite Film Exhibiting Low Conduction Loss and High Breakdown Strength for Energy Storage Applications
Source: MDPI journal article supplement (doi:10.3390/polym15051305), 2023-03-05
Supplement: s1 [file s1]

Supporting Information

# All-Organic PTFE Coated PVDF Composite Film Exhibiting Low Conduction Loss and High Breakdown Strength for Energy Storage Applications

Xiang-Shuo Meng, Yujiu Zhou \*, Jianfeng Li, Hu Ye, Fujia Chen, Yuetao Zhao \*, Qifeng Pan and Jianhua Xu

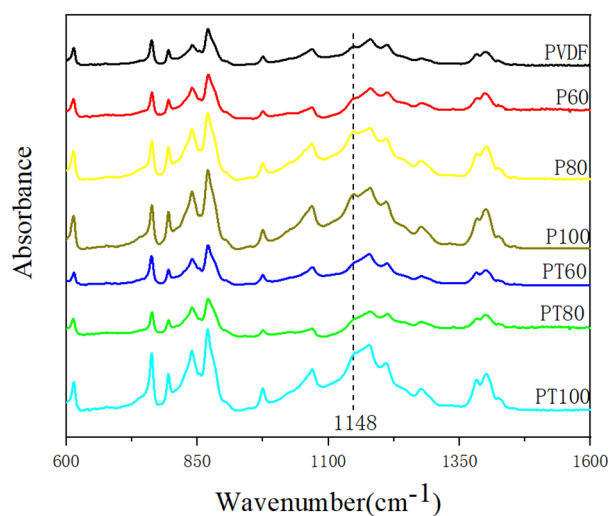

Figure S1. The FTIR spectra of PVDF and PTFE-c-PVDF.

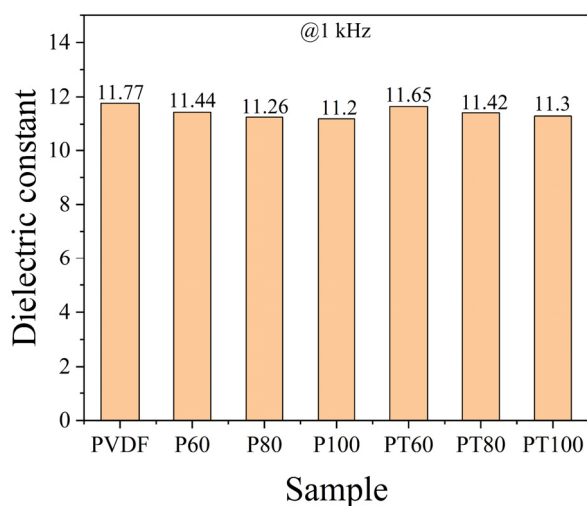

Figure S2. The dielectric constant of PVDF and its composite

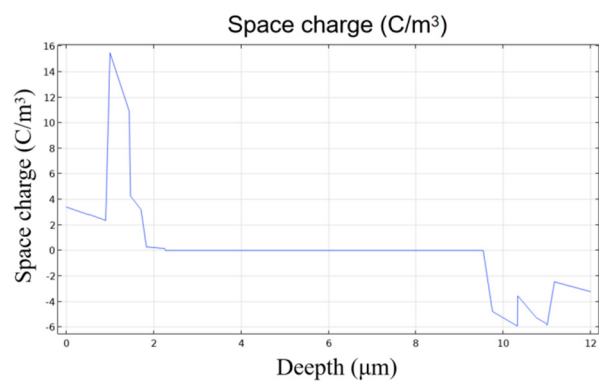

**Figure S3.** The Space charge simulation of PTFE-c-PVDF films

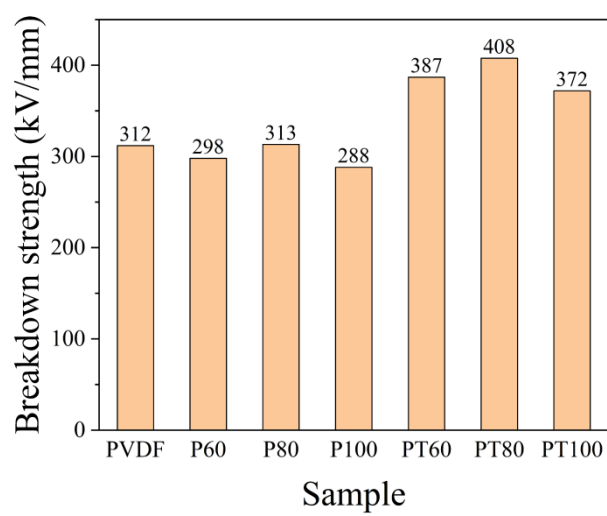

**Figure S4.** The breakdown strength of PVDF and its composite
